# Supplementary material for: Country-wide medical records infer increased allergy risk of gastric acid inhibition
Source: PubMed Central journal article supplement (PMC6667461; doi:10.1038/s41467-019-10914-6), 2019-07-30
Supplement: 41467_2019_10914_MOESM1_ESM.pdf [file 41467_2019_10914_MOESM1_ESM.pdf]

## Supplementary Material

**Supplementary Table 1.** Annual prevalence of anti-allergic and acid inhibitor prescriptions 2009 to 2013 in Austria by gender and age groups

| Age group | Anti-allergic medication |         | Acid inhibitors |         | Population  |         |
|-----------|--------------------------|---------|-----------------|---------|-------------|---------|
|           | Males                    | Females | Males           | Females | Males       | Females |
|           | %                        |         | %               |         | Annual mean |         |
| 0-4       | 7.21                     | 6.01    | 0.32            | 0.30    | 181,101     | 171,847 |
| 5-9       | 9.09                     | 6.73    | 0.54            | 0.59    | 205,392     | 195,746 |
| 10-14     | 8.81                     | 6.95    | 1.76            | 2.58    | 216,801     | 206,949 |
| 15-19     | 7.59                     | 8.32    | 5.61            | 8.50    | 242,036     | 232,541 |
| 20-24     | 6.23                     | 7.84    | 8.23            | 11.21   | 250,065     | 247,577 |
| 25-29     | 5.72                     | 7.69    | 9.97            | 12.81   | 270,236     | 263,871 |
| 30-34     | 5.55                     | 7.81    | 12.05           | 14.76   | 270,625     | 263,052 |
| 35-39     | 5.71                     | 8.64    | 14.63           | 18.03   | 279,437     | 278,889 |
| 40-44     | 5.40                     | 8.77    | 17.02           | 20.49   | 329,993     | 326,802 |
| 45-49     | 4.84                     | 8.31    | 19.37           | 23.37   | 348,506     | 342,583 |
| 50-54     | 4.43                     | 7.74    | 22.74           | 27.48   | 307,517     | 308,916 |
| 55-59     | 4.48                     | 7.68    | 27.50           | 31.64   | 249,361     | 260,934 |
| 60-64     | 4.72                     | 7.92    | 30.72           | 35.74   | 219,734     | 238,108 |
| 65-69     | 4.84                     | 8.15    | 34.07           | 41.10   | 193,623     | 220,509 |
| 70-74     | 4.20                     | 7.07    | 32.25           | 40.00   | 180,406     | 215,711 |
| 75-79     | 4.31                     | 7.38    | 34.72           | 44.98   | 111,622     | 151,622 |
| 80-84     | 4.14                     | 6.86    | 31.54           | 41.93   | 83,185      | 136,272 |
| 85-89     | 3.65                     | 5.75    | 25.64           | 34.27   | 41,720      | 102,670 |
| 90+       | 2.53                     | 3.68    | 16.32           | 20.11   | 14,183      | 48,105  |

**Supplementary Table 2.** ATC/DDD Codes (WHO Anatomical Therapeutic Chemical Classification System with Defined Daily Doses) of analysed substance classes /subclasses

|                                                    |                                                 |                                         |                                                            |                                                                            |                                          |                                                                                            |                                                      |                              |
|----------------------------------------------------|-------------------------------------------------|-----------------------------------------|------------------------------------------------------------|----------------------------------------------------------------------------|------------------------------------------|--------------------------------------------------------------------------------------------|------------------------------------------------------|------------------------------|
| <b>A</b><br><b>ALIMENTARY TRACT AND METABOLISM</b> | <b>A02</b>                                      | <b>DRUGS FOR ACID RELATED DISORDERS</b> | <b>A02A</b>                                                | <b>ANTACIDS</b>                                                            | A02AA                                    | Magnesium compounds                                                                        |                                                      |                              |
|                                                    |                                                 |                                         |                                                            |                                                                            | A02AB                                    | Aluminium compounds                                                                        |                                                      |                              |
|                                                    |                                                 |                                         |                                                            |                                                                            | A02AC                                    | Calcium compounds                                                                          |                                                      |                              |
|                                                    |                                                 |                                         |                                                            |                                                                            | A02AD                                    | Combinations and complexes of aluminium, calcium and magnesium compounds                   |                                                      |                              |
|                                                    |                                                 |                                         |                                                            |                                                                            | A02AF                                    | Antacids with antifatulents                                                                |                                                      |                              |
|                                                    |                                                 |                                         |                                                            |                                                                            | A02AG                                    | Antacids with antispasmodics                                                               |                                                      |                              |
|                                                    |                                                 |                                         |                                                            |                                                                            | A02AH                                    | Antacids with sodium bicarbonate                                                           |                                                      |                              |
|                                                    |                                                 |                                         |                                                            |                                                                            | A02AX                                    | Antacids, other combinations                                                               |                                                      |                              |
|                                                    |                                                 |                                         | <b>A02B</b>                                                | <b>DRUGS FOR PEPTIC ULCER AND GASTRO-OESOPHAGEAL REFLUX DISEASE (GORD)</b> | A02BD                                    | Combinations for eradication of <i>Helicobacter pylori</i>                                 |                                                      |                              |
|                                                    |                                                 |                                         |                                                            |                                                                            | A02BA                                    | H <sub>2</sub> -receptor antagonists                                                       |                                                      |                              |
|                                                    |                                                 |                                         |                                                            |                                                                            | A02BB                                    | Prostaglandins                                                                             |                                                      |                              |
|                                                    |                                                 |                                         |                                                            |                                                                            | A02BC                                    | Proton pump inhibitors                                                                     |                                                      |                              |
|                                                    |                                                 |                                         |                                                            |                                                                            | A02BX                                    | Other drugs for GORD (Sucralfate)                                                          |                                                      |                              |
| <b>A02X</b>                                        | <b>OTHER DRUGS FOR ACID RELATED DISORDERS</b>   |                                         |                                                            |                                                                            |                                          |                                                                                            |                                                      |                              |
| <b>R</b><br><b>RESPIRATORY SYSTEM</b>              | <b>R06</b>                                      | <b>ANTIHISTAMINES FOR SYSTEMIC USE</b>  | <b>R06A</b>                                                | <b>ANTIHISTAMINES FOR SYSTEMIC USE</b>                                     | R06AA                                    | Aminoalkyl ethers                                                                          |                                                      |                              |
|                                                    |                                                 |                                         |                                                            |                                                                            | R06AB                                    | Substituted alkylamines                                                                    |                                                      |                              |
|                                                    |                                                 |                                         |                                                            |                                                                            | R06AC                                    | Substituted ethylene diamines                                                              |                                                      |                              |
|                                                    |                                                 |                                         |                                                            |                                                                            | R06AD                                    | Phenothiazine derivatives                                                                  |                                                      |                              |
|                                                    |                                                 |                                         |                                                            |                                                                            | R06AE                                    | Piperazine derivatives                                                                     |                                                      |                              |
|                                                    |                                                 |                                         |                                                            |                                                                            | R06AK                                    | Combinations of antihistamines                                                             |                                                      |                              |
|                                                    |                                                 |                                         |                                                            |                                                                            | R06AX                                    | Other antihistamines for systemic use                                                      |                                                      |                              |
|                                                    |                                                 |                                         |                                                            |                                                                            | <b>C</b><br><b>CARDIOVASCULAR SYSTEM</b> | <b>C09</b>                                                                                 | <b>AGENTS ACTING ON THE RENIN-ANGIOTENSIN SYSTEM</b> | <b>C09A</b>                  |
| <b>C09B</b>                                        | <b>ACE INHIBITORS, COMBINATIONS</b>             | C09BA                                   | ACE inhibitors and diuretics                               |                                                                            |                                          |                                                                                            |                                                      |                              |
|                                                    |                                                 | C09BB                                   | ACE inhibitors and calcium channel blockers                |                                                                            |                                          |                                                                                            |                                                      |                              |
|                                                    |                                                 | C09BX                                   | ACE inhibitors, other combinations                         |                                                                            |                                          |                                                                                            |                                                      |                              |
| <b>C09C</b>                                        | <b>ANGIOTENSIN II ANTAGONISTS, PLAIN</b>        | C09CA                                   | Angiotensin II antagonists, plain                          |                                                                            |                                          |                                                                                            |                                                      |                              |
| <b>C09D</b>                                        | <b>ANGIOTENSIN II ANTAGONISTS, COMBINATIONS</b> | C09DA                                   | Angiotensin II antagonists and diuretics                   |                                                                            |                                          |                                                                                            |                                                      |                              |
|                                                    |                                                 | C09DB                                   | Angiotensin II antagonists and calcium channel blockers    |                                                                            |                                          |                                                                                            |                                                      |                              |
|                                                    |                                                 | C09DX                                   | Angiotensin II antagonists, other combinations             |                                                                            |                                          |                                                                                            |                                                      |                              |
|                                                    |                                                 | <b>C09X</b>                             | <b>OTHER AGENTS ACTING ON THE RENIN-ANGIOTENSIN SYSTEM</b> | C09XA                                                                      |                                          |                                                                                            |                                                      | Renin-inhibitors             |
| <b>C10</b>                                         | <b>LIPID MODIFYING AGENTS</b>                   | <b>C10A</b>                             | <b>LIPID MODIFYING AGENTS, PLAIN</b>                       | C10AA                                                                      |                                          |                                                                                            |                                                      | HMG CoA reductase inhibitors |
|                                                    |                                                 |                                         |                                                            | C10AB                                                                      |                                          | Fibrates                                                                                   |                                                      |                              |
|                                                    |                                                 |                                         |                                                            | C10AC                                                                      |                                          | Bile acid sequestrants                                                                     |                                                      |                              |
|                                                    |                                                 |                                         |                                                            | C10AD                                                                      |                                          | Nicotinic acid and derivatives                                                             |                                                      |                              |
|                                                    |                                                 |                                         |                                                            | C10AX                                                                      |                                          | Other lipid modifying agents                                                               |                                                      |                              |
|                                                    |                                                 | <b>C10B</b>                             | <b>LIPID MODIFYING AGENTS, COMBINATIONS</b>                | C10BA                                                                      |                                          | HMG CoA reductase inhibitors in combination with other lipid modifying agents combinations |                                                      |                              |
|                                                    |                                                 |                                         |                                                            | C10BX                                                                      |                                          | HMG CoA reductase inhibitors, other combinations                                           |                                                      |                              |

**Supplementary Table 3.** Percentage of individuals with anti-hypertensive or lipid-modifying medications (C09/C10 codes of ATC/DDD) among the total population insured in the county Burgenland and among subgroups with and without acid inhibitor prescription (2009 to 2013) and without non-steroidal anti-inflammatory (M01) co-medication.

| Population                  | N       | C09/C10 prescriptions | Percent |
|-----------------------------|---------|-----------------------|---------|
| All insured                 | 194,765 | 64,770                | 33.3    |
| w/o acid inhibitor          | 89,004  | 17,890                | 20.1    |
| with acid inhibitor         | 105,761 | 46,880                | 44.3    |
| Excluding M01 co-medication | 51,240  | 10,609                | 20.7    |

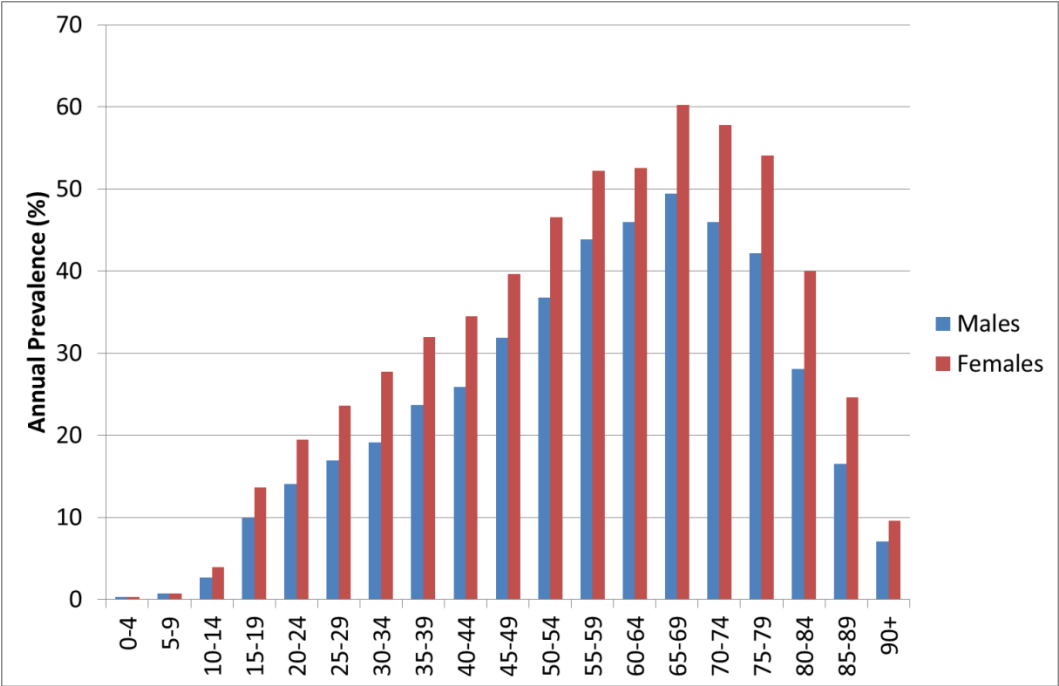

**Supplementary Figure 1.** Annual prevalence of acid inhibitor prescriptions in the Austrian province Burgenland 2009 to 2013

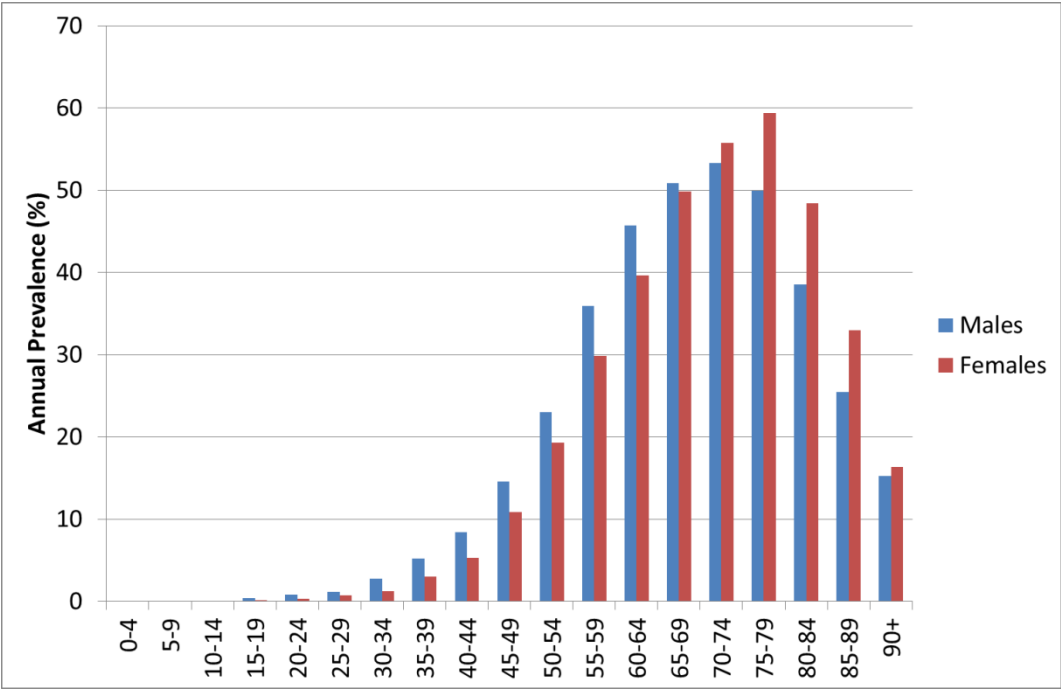

**Supplementary Figure 2.** Annual prevalence of prescriptions of antihypertensive drugs (C09) in the Austrian province Burgenland 2009 to 2013

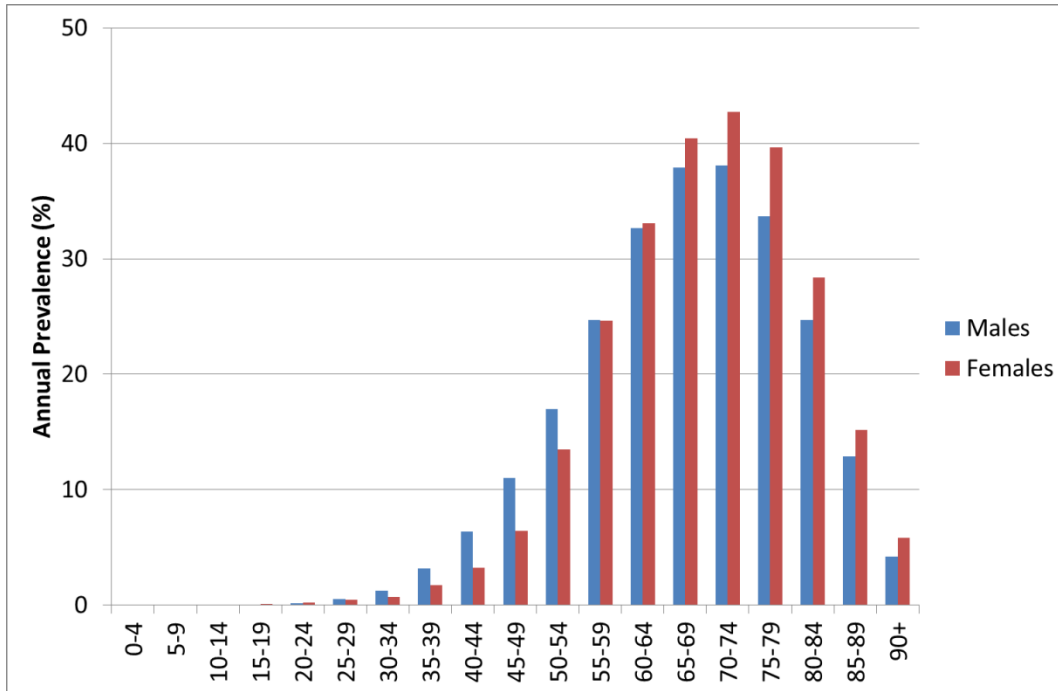

**Supplementary Figure 3.** Annual prevalence of prescriptions of lipid-modifying drugs (C10) in the Austrian province Burgenland 2009 to 2013

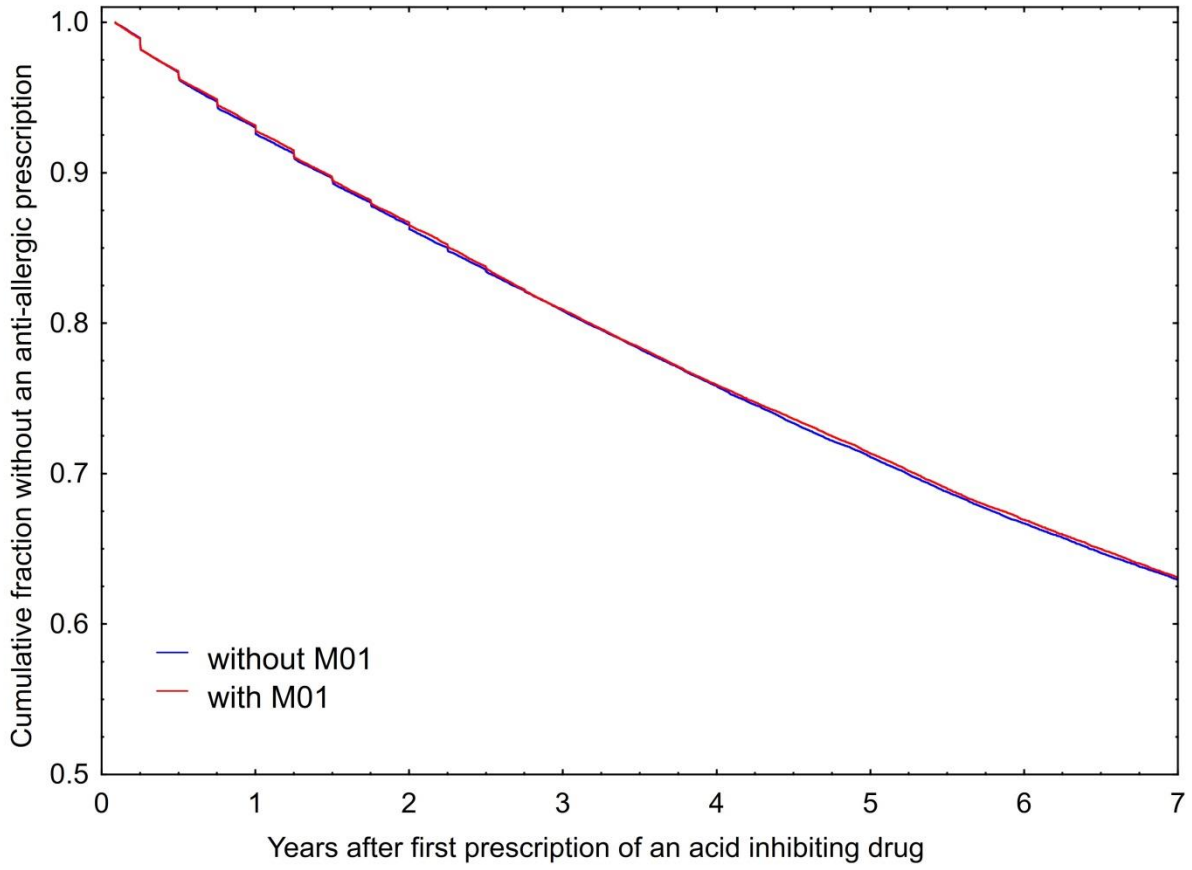

**Supplementary Figure 4.** Kaplan-Meier plots of the cumulative proportion without subsequent first anti-allergic medication for those with an acid inhibiting drug prescription in individuals with and without non-steroidal anti-inflammatory (M01) co-medication



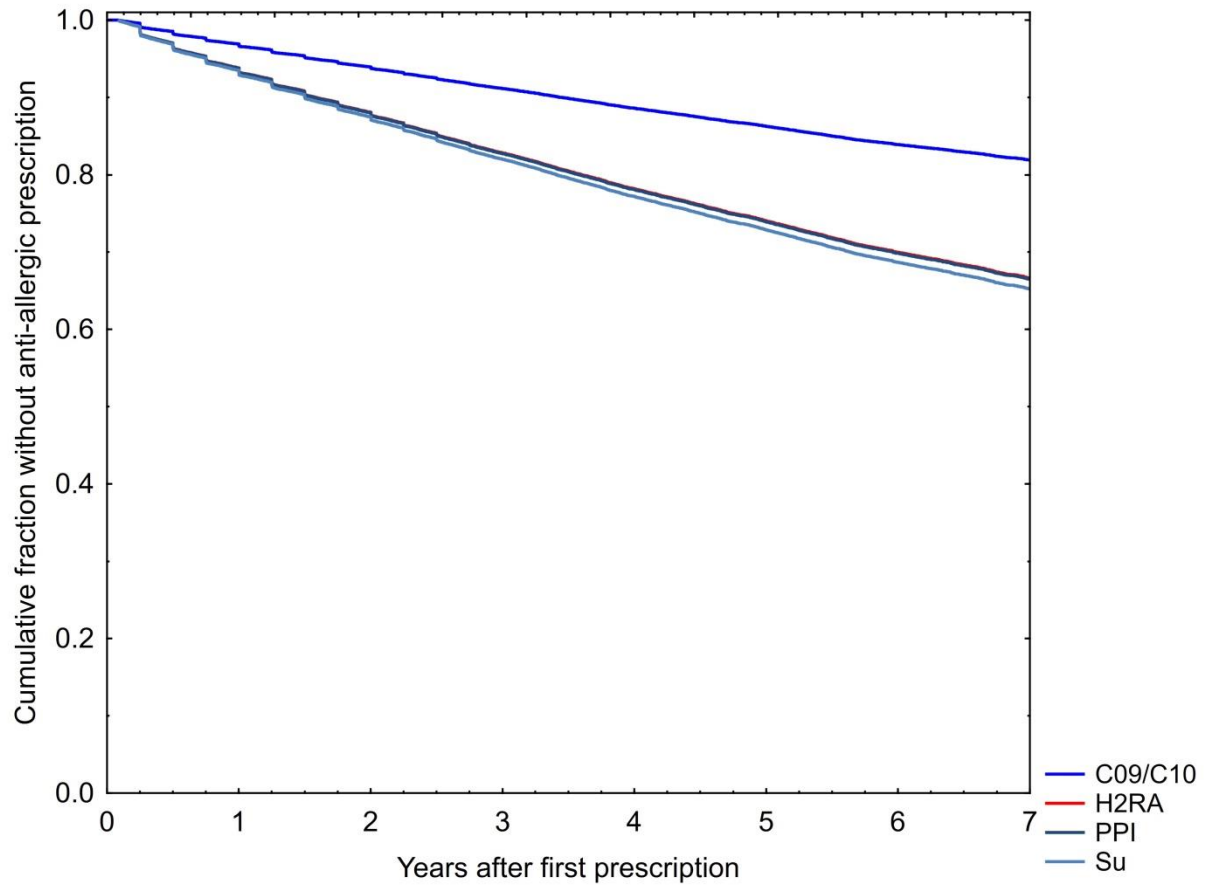

**Supplementary Figure 5.** Kaplan-Meier plots of the cumulative proportion without subsequent first anti-allergic medication for those with different classes of first acid inhibiting drug prescription and the contrast group of those with an anti-hypertensive or lipid-modifying drug (C09/C10) prescription (H2RA...H2 receptor antagonists, PPI...proton pump inhibitors, Su...sucralfate)

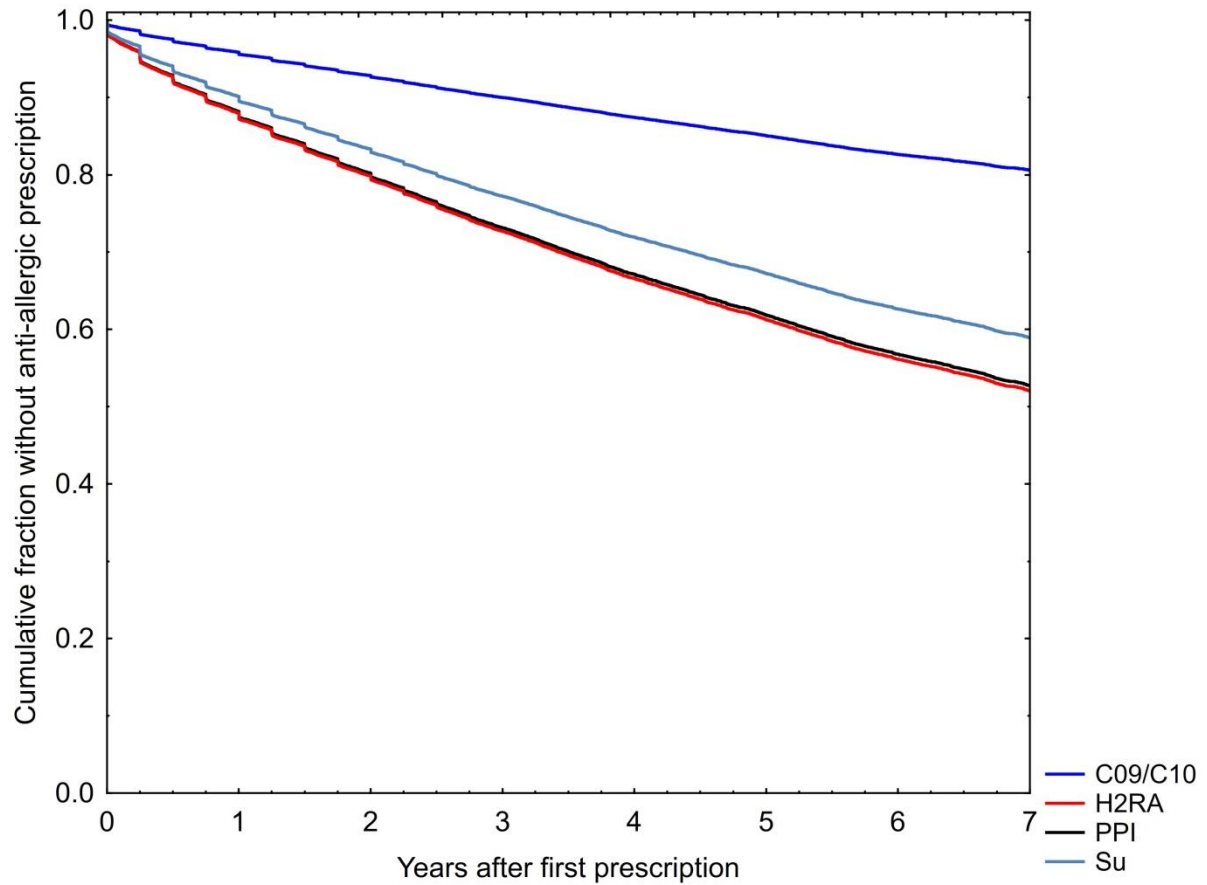

**Supplementary Figure 6.** Kaplan-Meier plots of the cumulative proportion without subsequent first anti-allergic medication for those with different classes of acid inhibiting drug prescription excluding those with prescriptions from more than one class and the contrast group of those with an anti-hypertensive or lipid-modifying drug (C09/C10) prescription (H2RA...H2 receptor antagonists, PPI...proton pump inhibitors, Su...sucralfate)

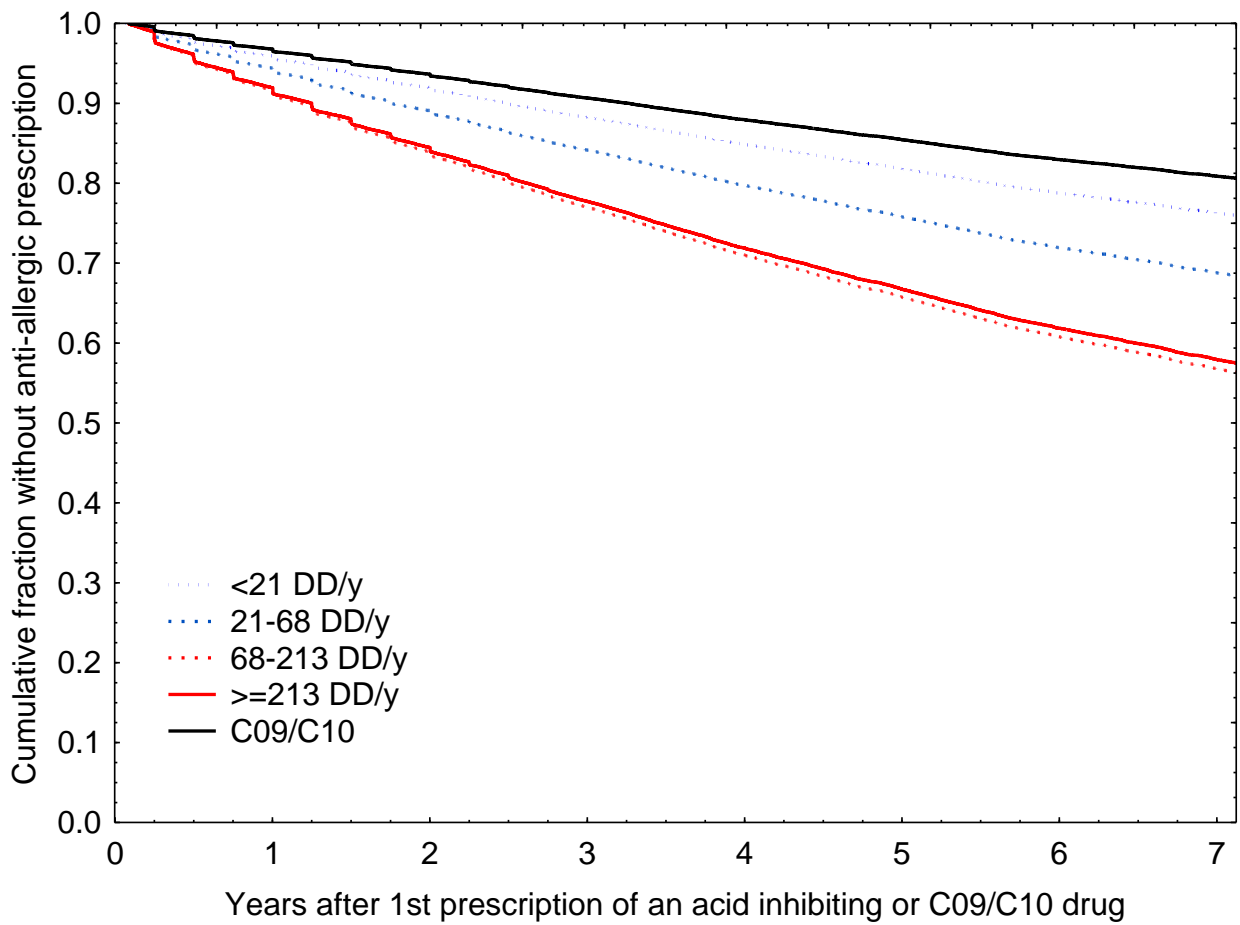

**Supplementary Figure 7.** Kaplan-Meier plots of the cumulative proportion without subsequent first anti-allergic medication for those with different daily doses per year of an acid inhibiting prescription and the contrast group of those with an anti-hypertensive or lipid-modifying drug (C09/C10) prescription

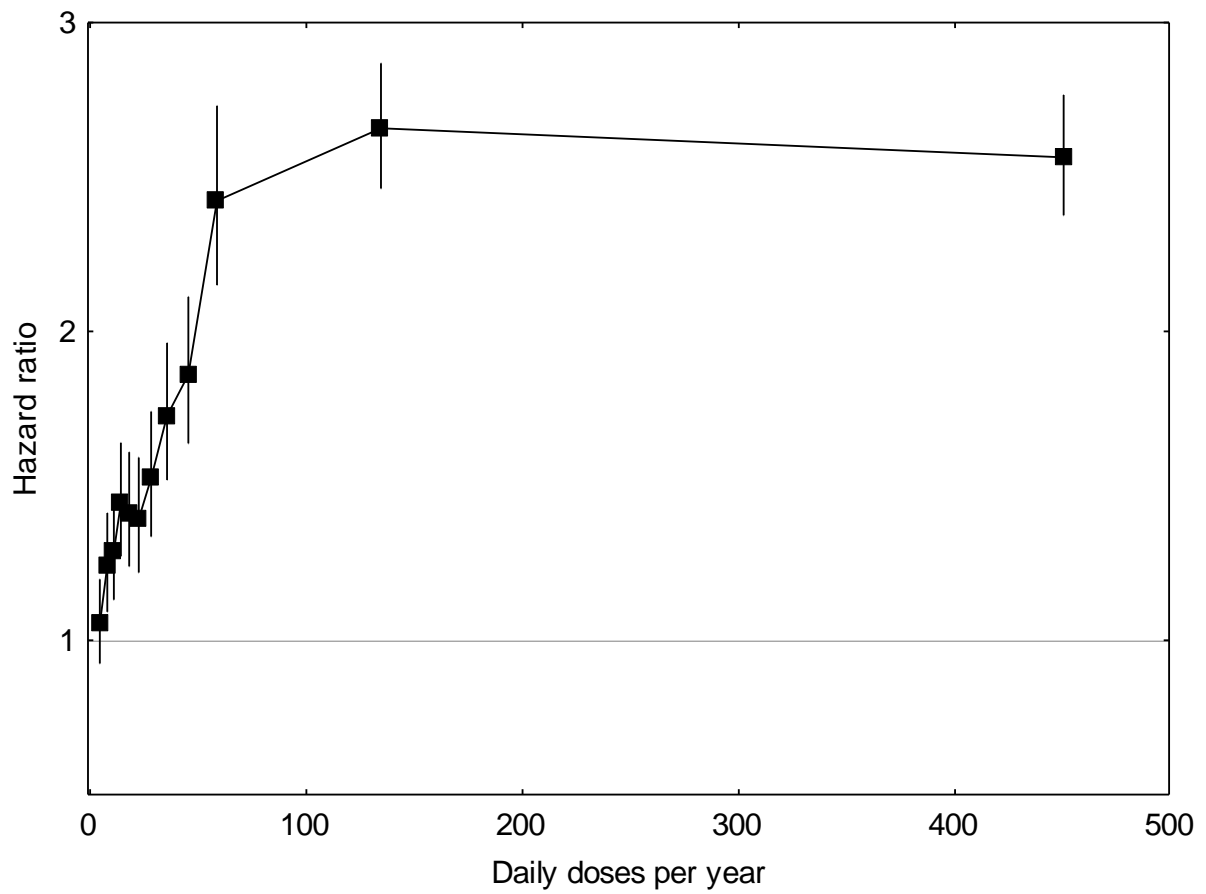

**Supplementary Figure S8.** Hazard ratios and 95% confidence intervals for categories of daily doses of acid inhibitors with respect to first prescription of an anti-allergic medication
